# Supplementary material for: Melatonin as an Antimicrobial Adjuvant and Anti-Inflammatory for the Management of Recurrent Clostridioides difficile Infection
Source: MDPI journal article supplement (doi:10.3390/antibiotics11111472), 2022-10-25
Supplement: s1 [file s1]

## SUPPLEMENT

**Table S1.** Propensity score weighted cohort characteristics: Patients alive at study end point

| Variable                 |                          | Unexposed | Melatonin<br>exposed | Standardized<br>difference |
|--------------------------|--------------------------|-----------|----------------------|----------------------------|
| Age                      |                          | 68.628    | 68.535               | 0.007                      |
| Sex                      | Female                   | 0.04      | 0.038                | 0.01                       |
|                          | Male                     | 0.96      | 0.962                | 0.01                       |
| Race                     | Black                    | 0.169     | 0.167                | 0.006                      |
|                          | Other/unknown            | 0.062     | 0.064                | 0.009                      |
|                          | White                    | 0.769     | 0.769                | 0                          |
| BMI                      | <18.5                    | 0.057     | 0.041                | 0.066                      |
|                          | 18.5-24.9                | 0.324     | 0.32                 | 0.009                      |
|                          | 25-29.9                  | 0.288     | 0.29                 | 0.004                      |
|                          | 30+                      | 0.293     | 0.308                | 0.033                      |
|                          | Missing                  | 0.038     | 0.041                | 0.013                      |
| Charlson                 |                          | 4.147     | 4.156                | 0.003                      |
| Level of care            | acute care               | 0.845     | 0.832                | 0.036                      |
|                          | sub acute care           | 0.155     | 0.168                | 0.036                      |
| <i>C. diff</i> treatment | fidaxomicin              | 0.003     | 0.003                | 0                          |
|                          | metronidazole            | 0.569     | 0.544                | 0.051                      |
|                          | van+fid+met              | 0         | 0                    | 0.01                       |
|                          | vancomycin               | 0.371     | 0.397                | 0.055                      |
|                          | vancomycin+metronidazole | 0.057     | 0.056                | 0.005                      |
| Leukocytosis             |                          | 0.156     | 0.131                | 0.067                      |
| Albumin <3.4 mg/dL       |                          | 0.01      | 0.009                | 0.012                      |
| Serum creatinine >1.5    |                          | 0.187     | 0.187                | 0.001                      |

**Table S2.** Propensity score weighted cox proportional hazards model evaluating the risk of recurrent *Clostridioides difficile* among patients alive at study end

| Variable                 |                                | HR (95% CI)         |
|--------------------------|--------------------------------|---------------------|
| Melatonin                |                                | 0.78 (0.671-0.907)  |
| Age                      |                                | 1.012 (1.008-1.015) |
| Sex                      | Male vs. Female                | 0.995 (0.695-1.425) |
| Race                     | Other/unknown vs. Black        | 0.97 (0.731-1.287)  |
|                          | White vs. black                | 1.268 (1.05-1.531)  |
| BMI                      | 18.5-24.9 vs. <18.5            | 0.864 (0.677-1.102) |
|                          | 25-29.9 vs. <18.5              | 0.737 (0.571-0.952) |
|                          | 30+ vs. <18.5                  | 0.734 (0.573-0.941) |
|                          | Missing vs. <18.5              | 0.961 (0.679-1.362) |
| Charlson                 |                                | 1.039 (1.02-1.059)  |
| Level of care            | sub-acute vs. acute care       | 1.805 (1.558-2.091) |
| <i>C. diff</i> treatment | metronidazole vs. fidaxomicin  | 0.501 (0.308-0.815) |
|                          | van+fid+met vs. fidaxomicin    | 0 (0-0)             |
|                          | vancomycin vs. fidaxomicin     | 0.401 (0.248-0.649) |
|                          | vancomycin+met vs. fidaxomicin | 0.502 (0.299-0.843) |
| Leukocytosis             |                                | 1.231 (1.042-1.454) |
| Albumin <3.4 mg/dL       |                                | 0.808 (0.532-1.227) |
| Serum creatinine >1.5    |                                | 1.038 (0.871-1.238) |

**Table S3.** Propensity score weighted cohort characteristics: Patients with PCR testing

| Variable                 |                          | Unexposed | Melatonin exposed | Standardized difference |
|--------------------------|--------------------------|-----------|-------------------|-------------------------|
| Age                      |                          | 69.214    | 69.811            | 0.043                   |
| Sex                      | Female                   | 0.04      | 0.036             | 0.021                   |
|                          | Male                     | 0.96      | 0.964             | 0.021                   |
| Race                     | Black                    | 0.182     | 0.144             | 0.1                     |
|                          | Other/unknown            | 0.06      | 0.069             | 0.034                   |
|                          | White                    | 0.757     | 0.787             | 0.07                    |
| BMI                      | <18.5                    | 0.061     | 0.053             | 0.033                   |
|                          | 18.5-24.9                | 0.33      | 0.321             | 0.018                   |
|                          | 25-29.9                  | 0.283     | 0.289             | 0.012                   |
|                          | 30+                      | 0.29      | 0.292             | 0.003                   |
|                          | Missing                  | 0.035     | 0.045             | 0.052                   |
| Charlson                 |                          | 4.291     | 4.849             | 0.165                   |
| Level of care            | acute care               | 0.861     | 0.828             | 0.092                   |
|                          | sub acute care           | 0.139     | 0.172             | 0.092                   |
| <i>C. diff</i> treatment | fidaxomicin              | 0.003     | 0.006             | 0.054                   |
|                          | metronidazole            | 0.593     | 0.199             | 0.791                   |
|                          | van+fid+met              | 0         | 0                 | 0.012                   |
|                          | vancomycin               | 0.342     | 0.747             | 0.827                   |
|                          | vancomycin+metronidazole | 0.062     | 0.048             | 0.059                   |
| Leukocytosis             |                          | 0.162     | 0.157             | 0.015                   |
| Albumin <3.4 mg/dL       |                          | 0.014     | 0.021             | 0.057                   |
| Serum creatinine >1.5    |                          | 0.194     | 0.212             | 0.045                   |

**Table S4.** Propensity score weighted cox proportional hazards model evaluating the risk of recurrent *Clostridioides difficile* among patients with PCR testing

| Variable                 |                                | HR (95% CI)         |
|--------------------------|--------------------------------|---------------------|
| Melatonin                |                                | 0.783 (0.673-0.912) |
| Age                      |                                | 1.008 (1.004-1.012) |
| Sex                      | Male vs. Female                | 0.919 (0.628-1.343) |
| Race                     | Other/unknown vs. Black        | 0.96 (0.708-1.303)  |
|                          | White vs. black                | 1.237 (1.021-1.499) |
| BMI                      | 18.5-24.9 vs. <18.5            | 0.861 (0.65-1.14)   |
|                          | 25-29.9 vs. <18.5              | 0.709 (0.532-0.946) |
|                          | 30+ vs. <18.5                  | 0.762 (0.574-1.011) |
|                          | Missing vs. <18.5              | 1.009 (0.681-1.494) |
| Charlson                 |                                | 1.039 (1.02-1.059)  |
| Level of care            | sub-acute vs. acute care       | 1.864 (1.596-2.176) |
| <i>C. diff</i> treatment | metronidazole vs. fidaxomicin  | 0.434 (0.243-0.777) |
|                          | van+fid+met vs. fidaxomicin    | 0 (0-0)             |
|                          | vancomycin vs. fidaxomicin     | 0.355 (0.199-0.632) |
|                          | vancomycin+met vs. fidaxomicin | 0.437 (0.237-0.806) |
| Leukocytosis             |                                | 1.192 (1.01-1.406)  |
| Albumin <3.4 mg/dL       |                                | 0.745 (0.48-1.155)  |
| Serum creatinine >1.5    |                                | 0.966 (0.814-1.148) |

Among the patients in the study, 85% were diagnosed with a PCR and 15% were diagnosed via EIA. This analysis represents only patients diagnosed via PCR.

**Table S5.** Propensity score weighted cohort characteristics: Patients in sub-acute (nursing home) setting

| Variable                 |                          | Unexposed | Melatonin<br>exposed | Standardized<br>difference |
|--------------------------|--------------------------|-----------|----------------------|----------------------------|
| Age                      |                          | 71.789    | 71.967               | 0.014                      |
| Sex                      | Female                   | 0.028     | 0.016                | 0.076                      |
|                          | Male                     | 0.972     | 0.984                | 0.076                      |
| Race                     | Black                    | 0.131     | 0.115                | 0.047                      |
|                          | Other/unknown            | 0.07      | 0.052                | 0.069                      |
|                          | White                    | 0.799     | 0.833                | 0.084                      |
| BMI                      | <18.5                    | 0.062     | 0.037                | 0.106                      |
|                          | 18.5-24.9                | 0.332     | 0.352                | 0.042                      |
|                          | 25-29.9                  | 0.278     | 0.274                | 0.009                      |
|                          | 30+                      | 0.268     | 0.282                | 0.031                      |
|                          | Missing                  | 0.061     | 0.056                | 0.019                      |
| Charlson                 |                          | 4.687     | 5.039                | 0.104                      |
| <i>C. diff</i> treatment | fidaxomicin              | 0.002     | 0.004                | 0.033                      |
|                          | metronidazole            | 0.673     | 0.627                | 0.098                      |
|                          | van+fid+met              | 0         | 0                    | 0                          |
|                          | vancomycin               | 0.292     | 0.336                | 0.097                      |
|                          | vancomycin+metronidazole | 0.033     | 0.032                | 0.001                      |
| Leukocytosis             |                          | 0.086     | 0.047                | 0.143                      |
| Albumin <3.4 mg/dL       |                          | 0.002     | 0.004                | 0.035                      |
| Serum creatinine >1.5    |                          | 0.115     | 0.09                 | 0.076                      |

**Table S6.** Propensity score weighted cox proportional hazards model evaluating the risk of recurrent *Clostridioides difficile* among patients in sub-acute (nursing home) setting

| Variable*             |                         | HR (95% CI)         |
|-----------------------|-------------------------|---------------------|
| Melatonin             |                         | 0.732 (0.575-0.933) |
| Age                   |                         | 1.012 (1.005-1.019) |
| Sex                   | Male vs. Female         | 1.691 (0.935-3.059) |
| Race                  | Other/unknown vs. Black | 0.865 (0.564-1.327) |
|                       | White vs. black         | 1.169 (0.874-1.563) |
| BMI                   | 18.5-24.9 vs. <18.5     | 0.709 (0.452-1.112) |
|                       | 25-29.9 vs. <18.5       | 0.582 (0.364-0.933) |
|                       | 30+ vs. <18.5           | 0.816 (0.503-1.324) |
|                       | Missing vs. <18.5       | 0.639 (0.368-1.11)  |
| Charlson              |                         | 1.032 (1.005-1.059) |
| Leukocytosis          |                         | 1.781 (1.316-2.41)  |
| Albumin <3.4 mg/dL    |                         | 0 (0-0)             |
| Serum creatinine >1.5 |                         | 1.04 (0.761-1.42)   |

\*because of small samples, treatment type was omitted
